# Supplementary material for: Study of the structure–activity relationship of metallocene-catalysed poly-α-olefin (mPAO) base oil
Source: Royal Society of Chemistry journal article supplement (doi:10.1039/d1me00032b), 2021-01-01
Supplement: d1me00032b2.pdf [file d1me00032b2.pdf]

## Supporting Information for:

### Study on the structure-activity relationship of metallocene poly- $\alpha$ -olefin (mPAO) base oil

#### **NMR spectra**

|                                           |              |
|-------------------------------------------|--------------|
| <b>1. spectrum of 1-hexene oligomer</b>   | <b>2-5</b>   |
| <b>2. spectrum of 1-octene oligomer</b>   | <b>6-8</b>   |
| <b>3. spectrum of 1-decene oligomer</b>   | <b>9-11</b>  |
| <b>4. spectrum of 1-dodecene oligomer</b> | <b>12-13</b> |

# 1. spectrum of 1-hexene oligomer

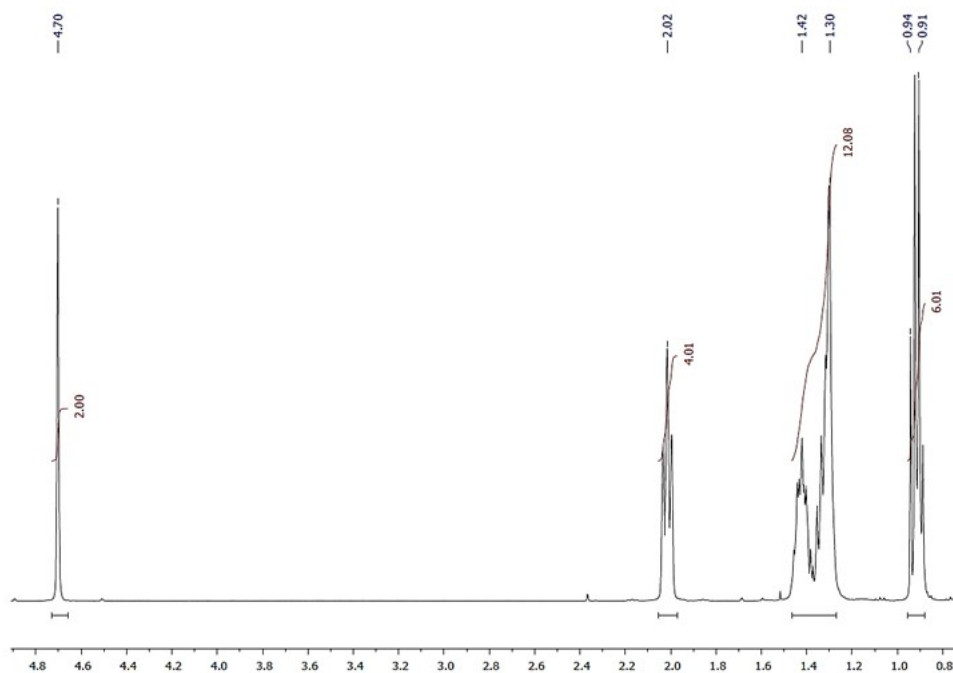

$^1\text{H}$  NMR spectrum of the dimer of 1- $\text{C}_6$

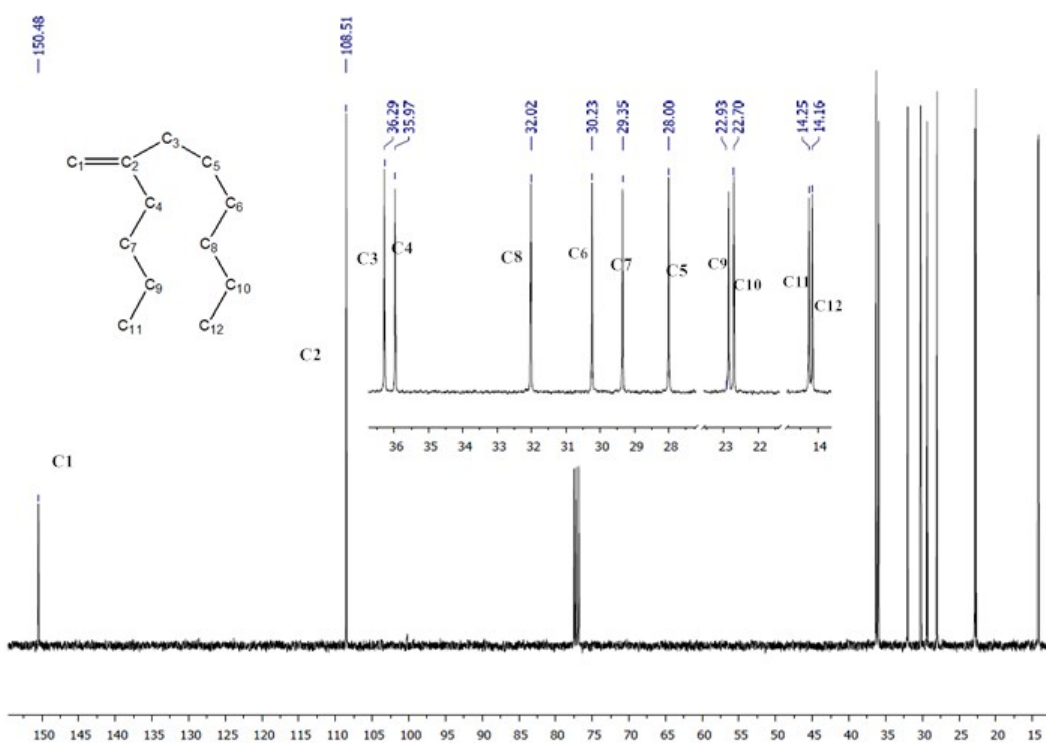

$^{13}\text{C}$  NMR spectrum of the dimer of 1- $\text{C}_6$

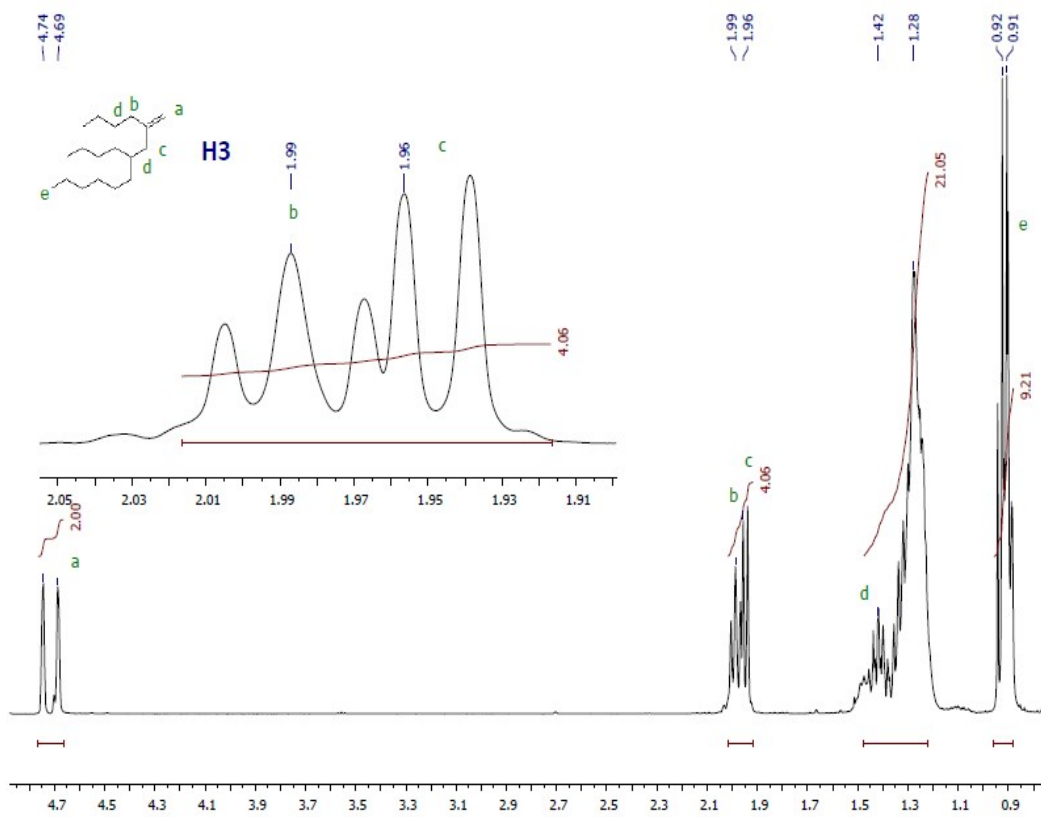

<sup>1</sup>H NMR spectrum of the Timer of 1-C<sub>6</sub>

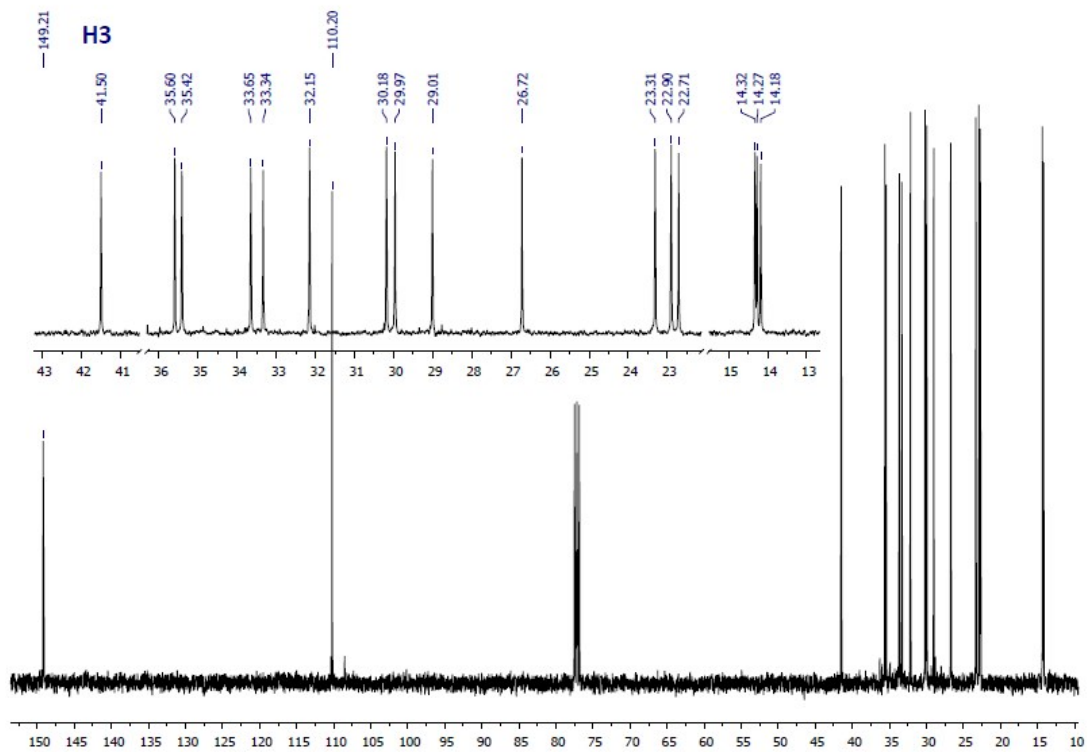

<sup>13</sup>C NMR spectrum of the Timer of 1-C<sub>6</sub>

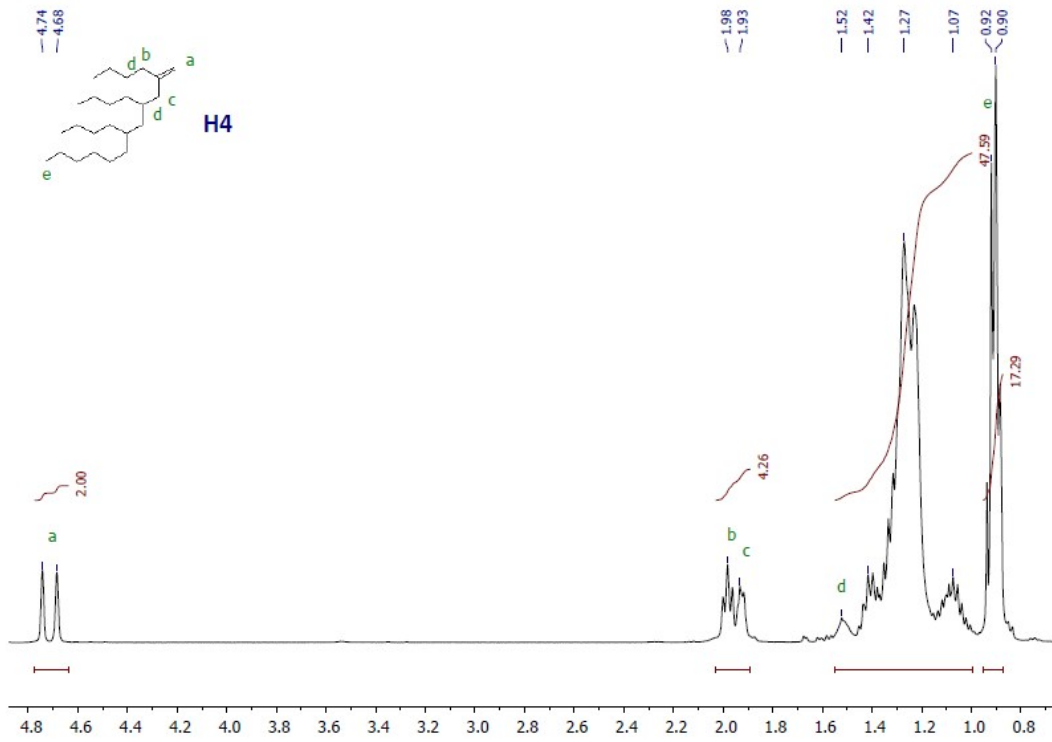

$^1\text{H}$  NMR spectrum of the Tetramer of 1-C<sub>6</sub>

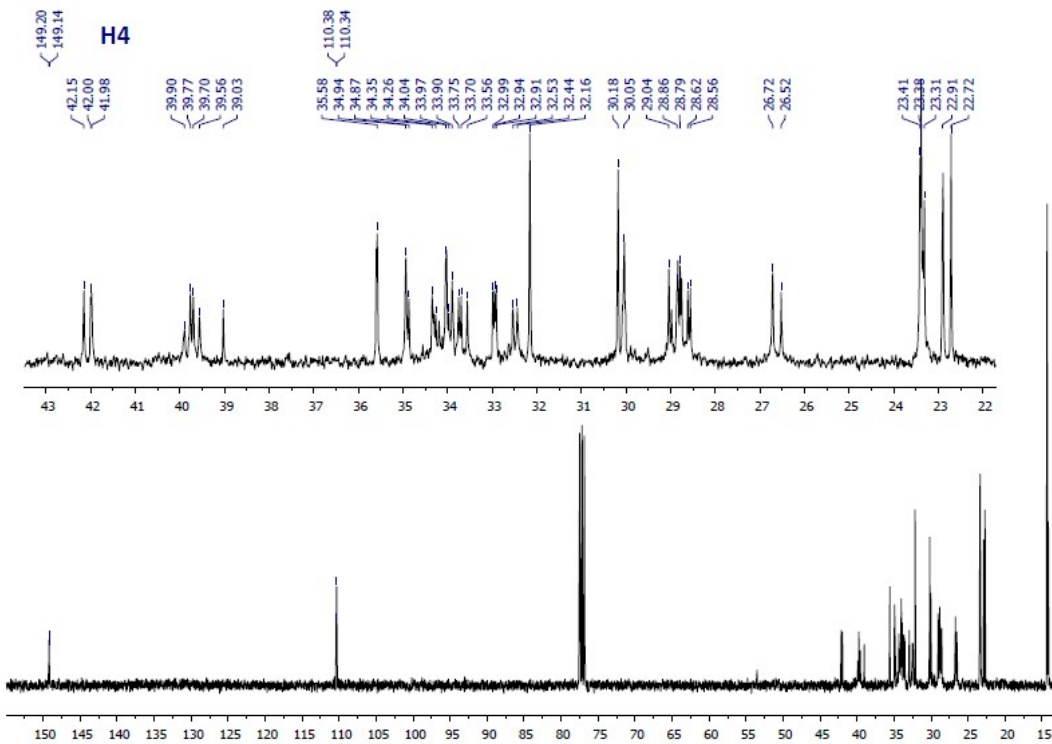

$^{13}\text{C}$  NMR spectrum of the Tetramer of 1-C<sub>6</sub>

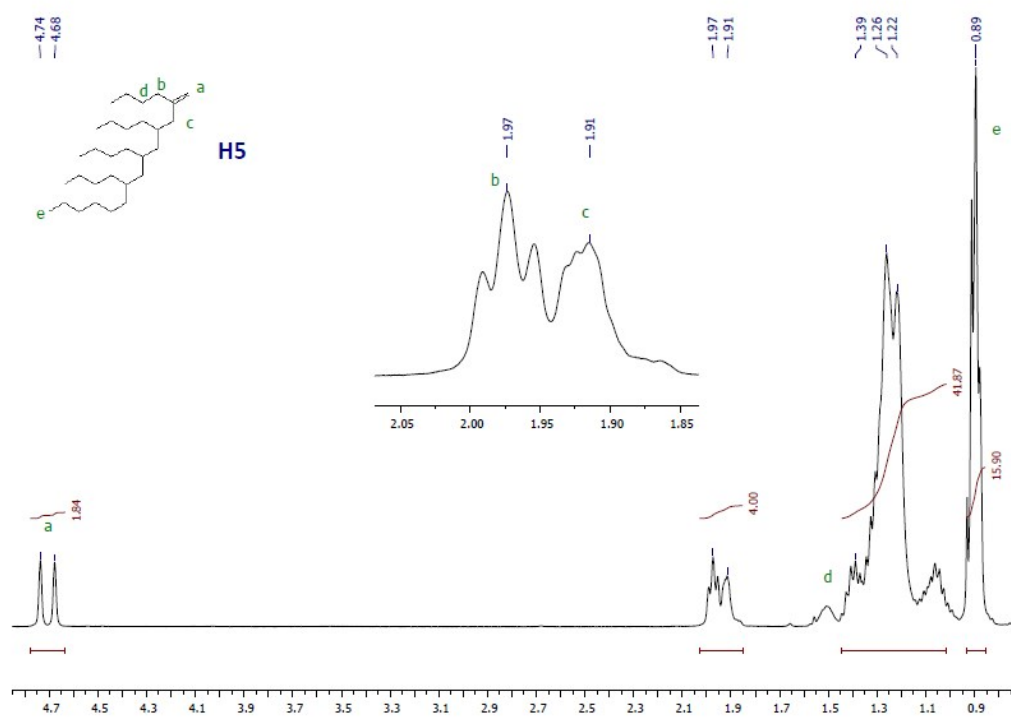

<sup>1</sup>H NMR spectrum of the Pentamer of 1-C<sub>6</sub>

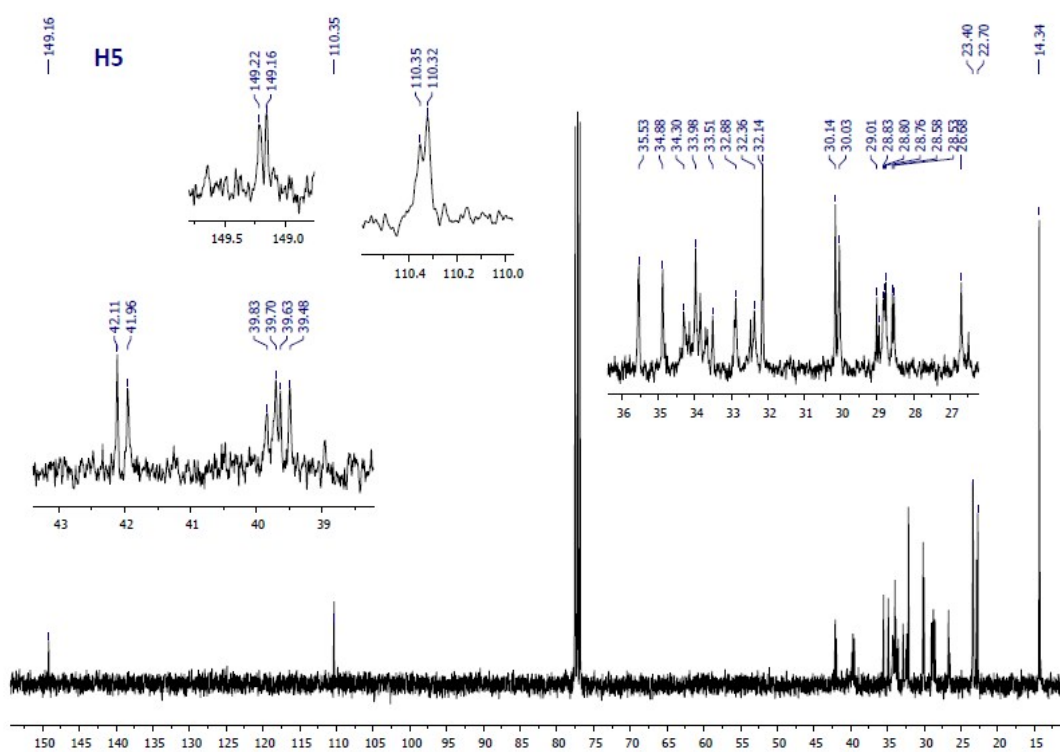

<sup>13</sup>C NMR spectrum of the Pentamer of 1-C<sub>6</sub>

## 2. spectrum of 1-octene oligomer

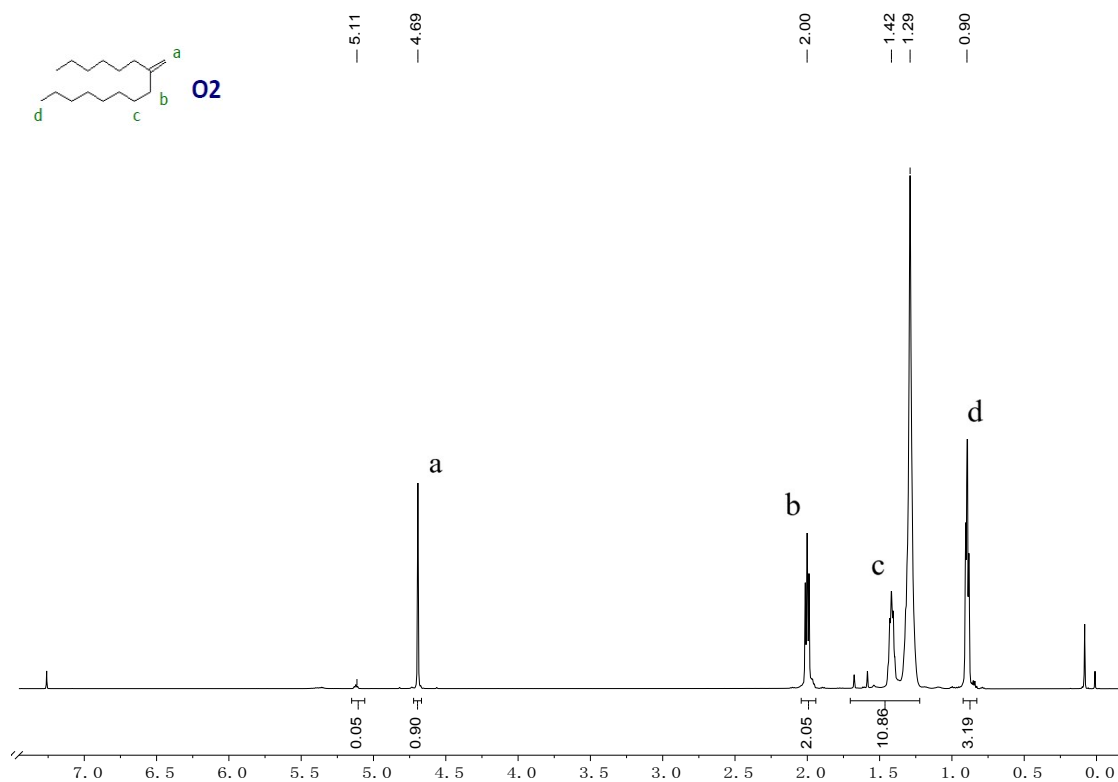

<sup>1</sup>H NMR spectrum of the dimer of 1-C<sub>8</sub>

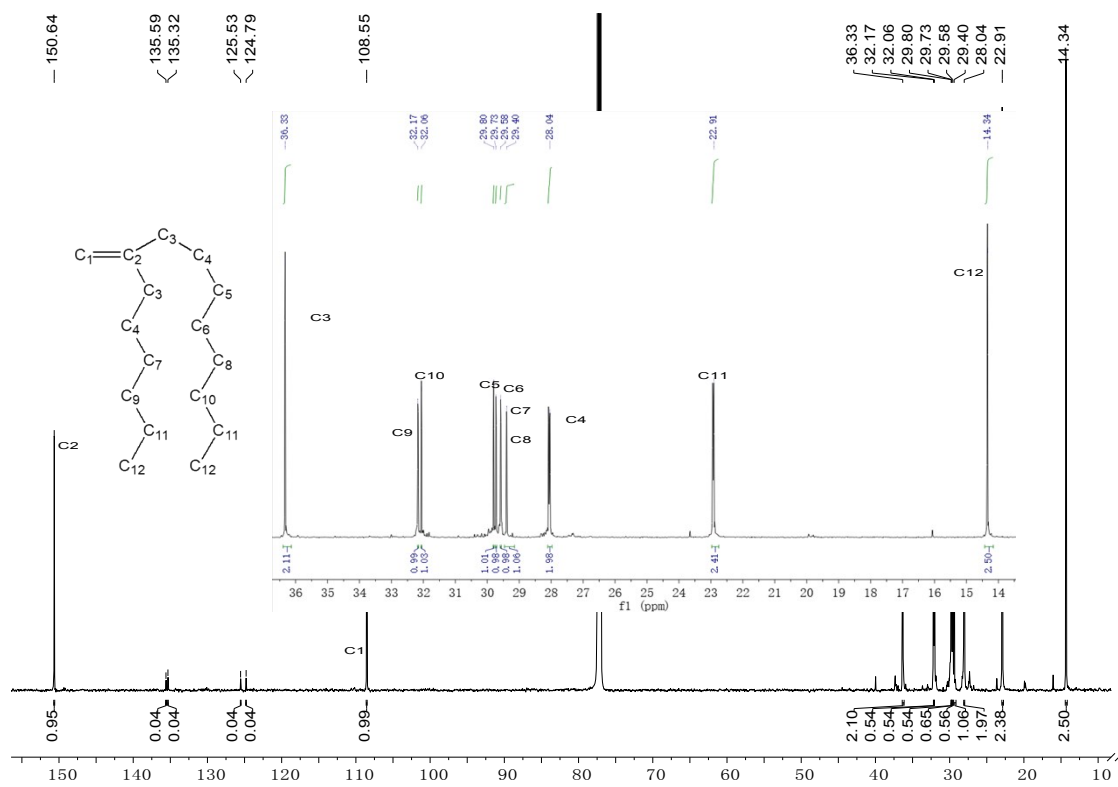

<sup>13</sup>C NMR spectrum of the dimer of 1-C<sub>8</sub>

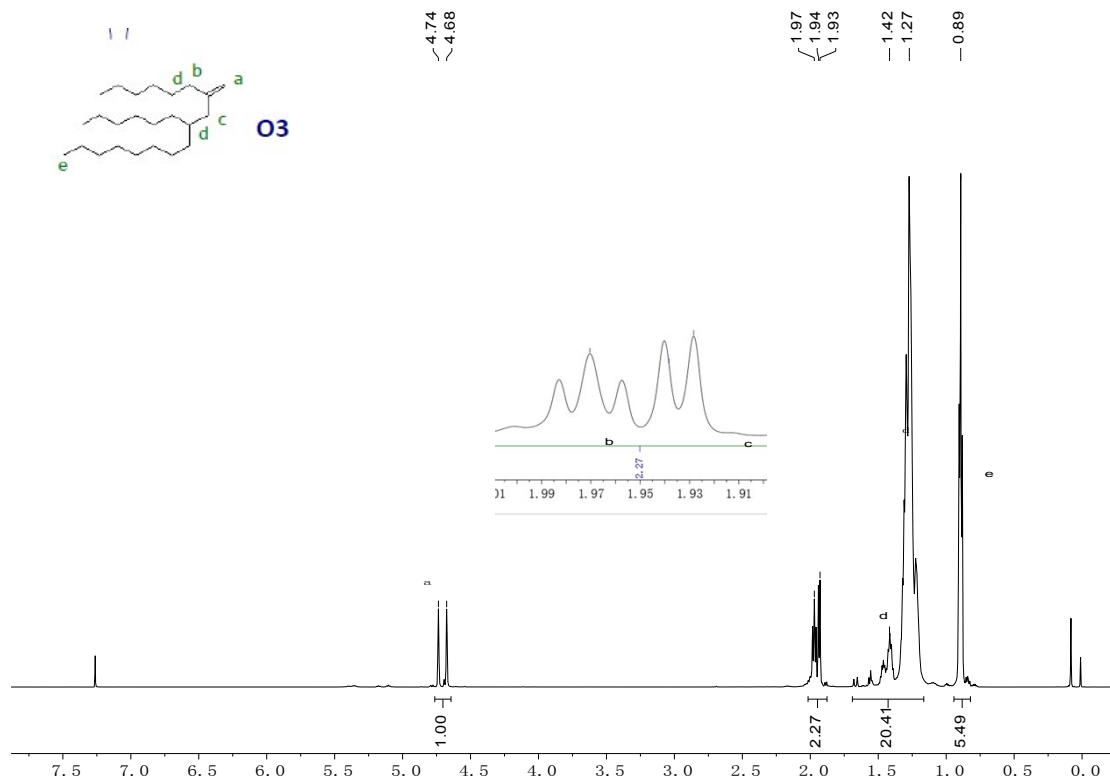

<sup>1</sup>H NMR spectrum of the Timer of 1-C<sub>8</sub>

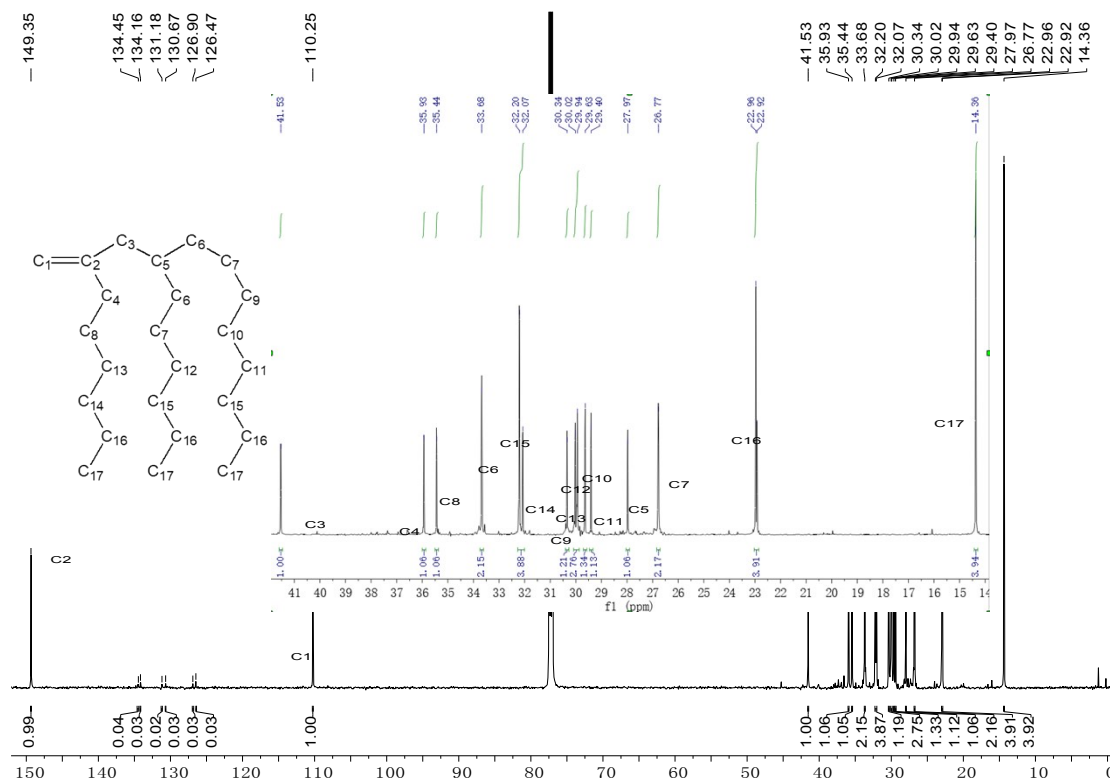

<sup>13</sup>C NMR spectrum of the Timer of 1-C<sub>8</sub>

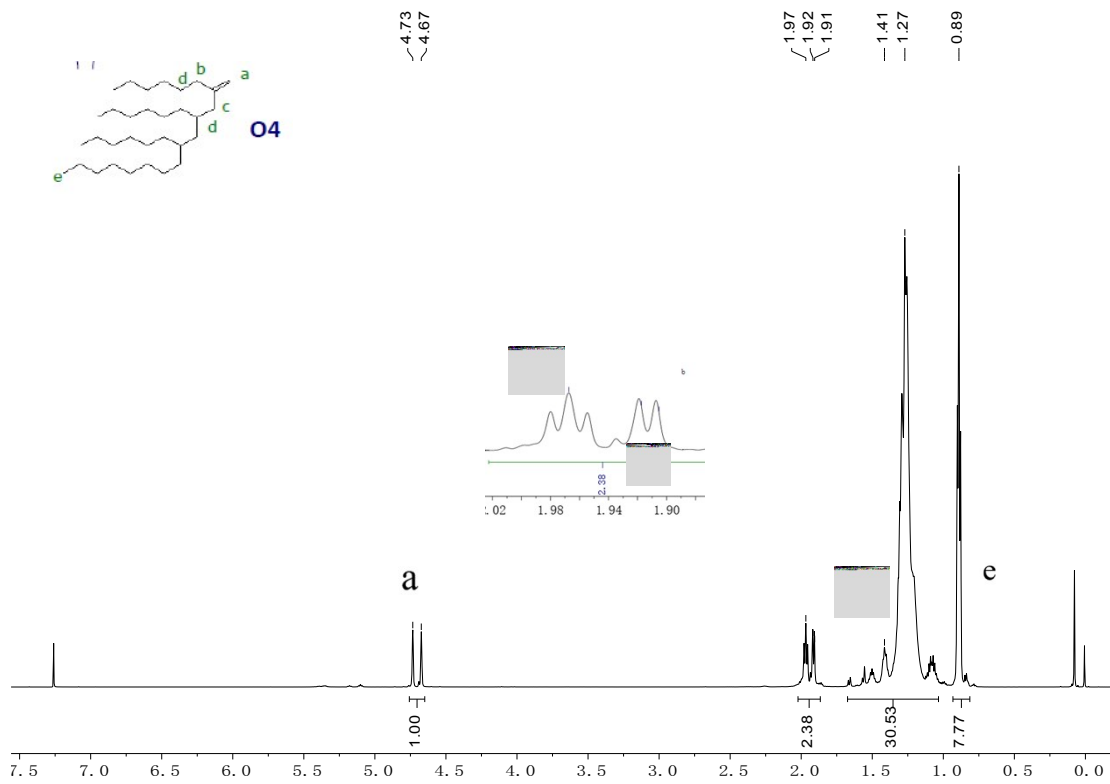

**<sup>1</sup>H NMR spectrum of the Tetramer of 1-C<sub>8</sub>**

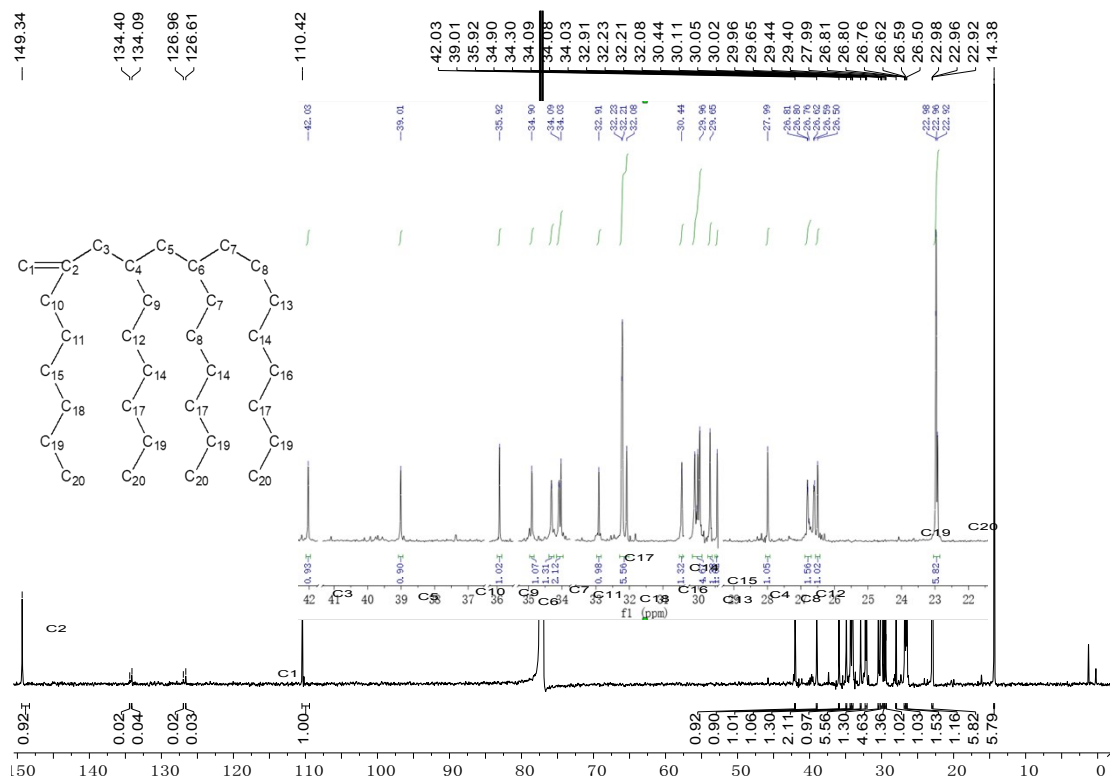

**<sup>13</sup>C NMR spectrum of the Tetramer of 1-C<sub>8</sub>**



### 3. spectrum of 1-decene oligomer

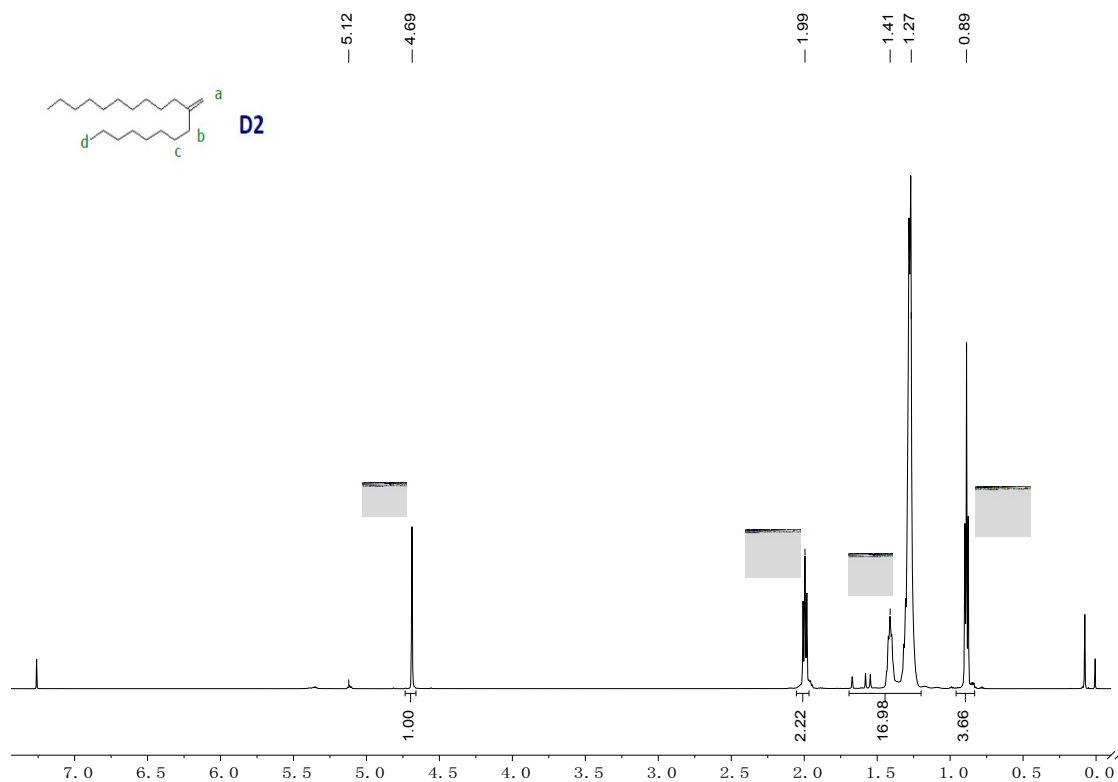

$^1\text{H}$  NMR spectrum of the dimer of 1-C<sub>10</sub>

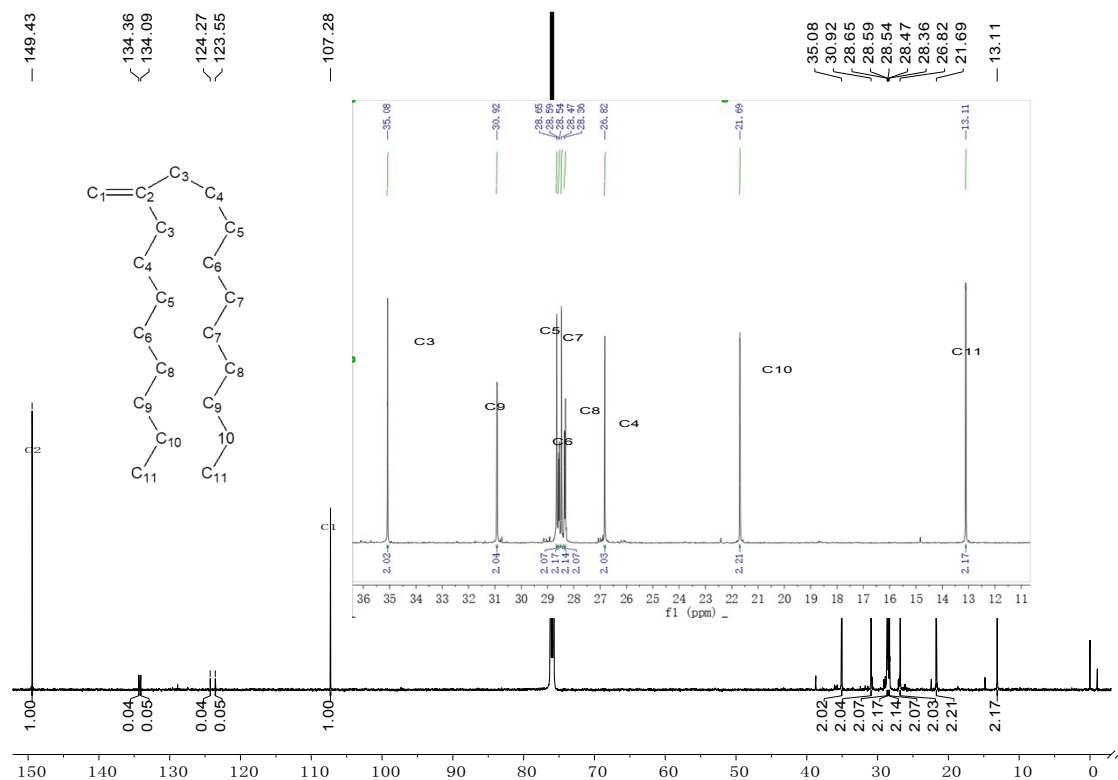

$^{13}\text{C}$  NMR spectrum of the dimer of 1-C<sub>10</sub>

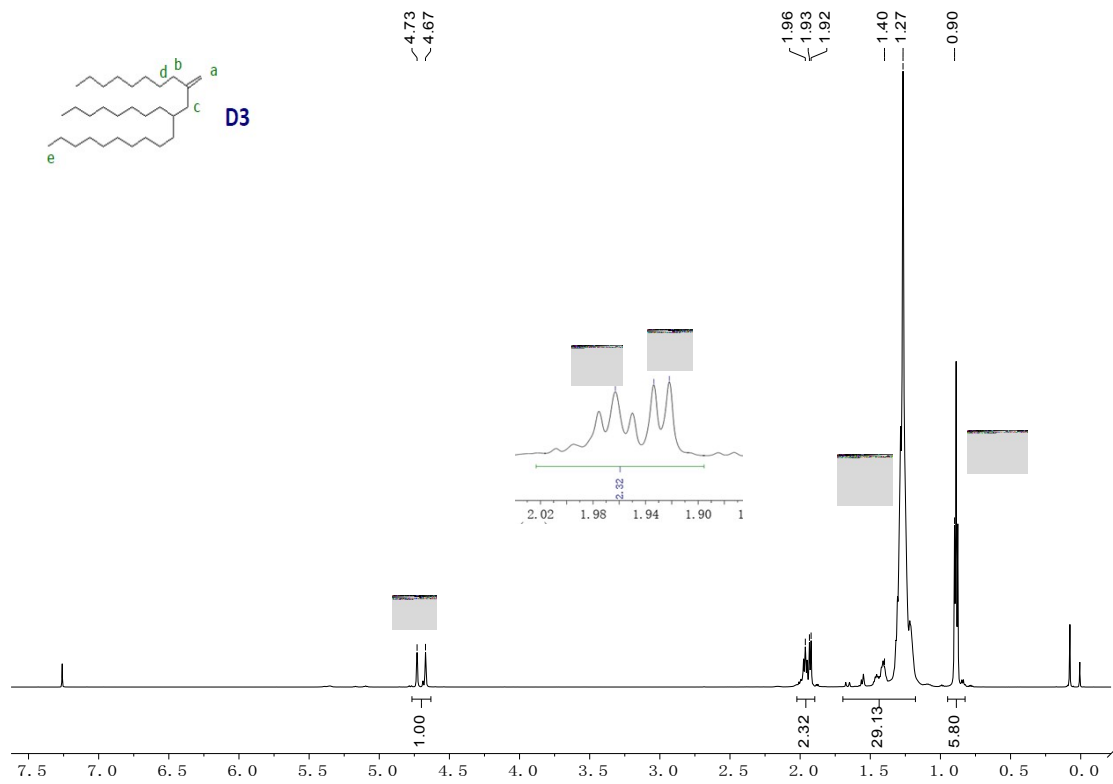

**<sup>1</sup>H NMR spectrum of the Timer of 1-C<sub>10</sub>**

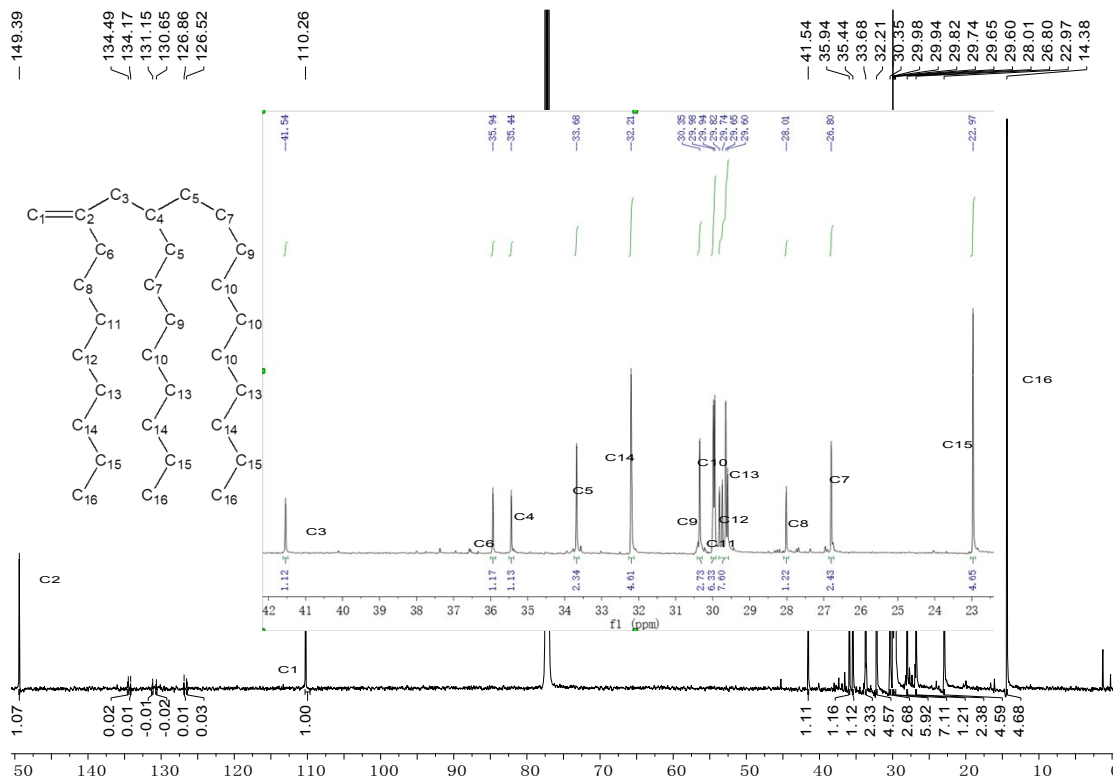

**<sup>13</sup>C NMR spectrum of the Timer of 1-C<sub>10</sub>**

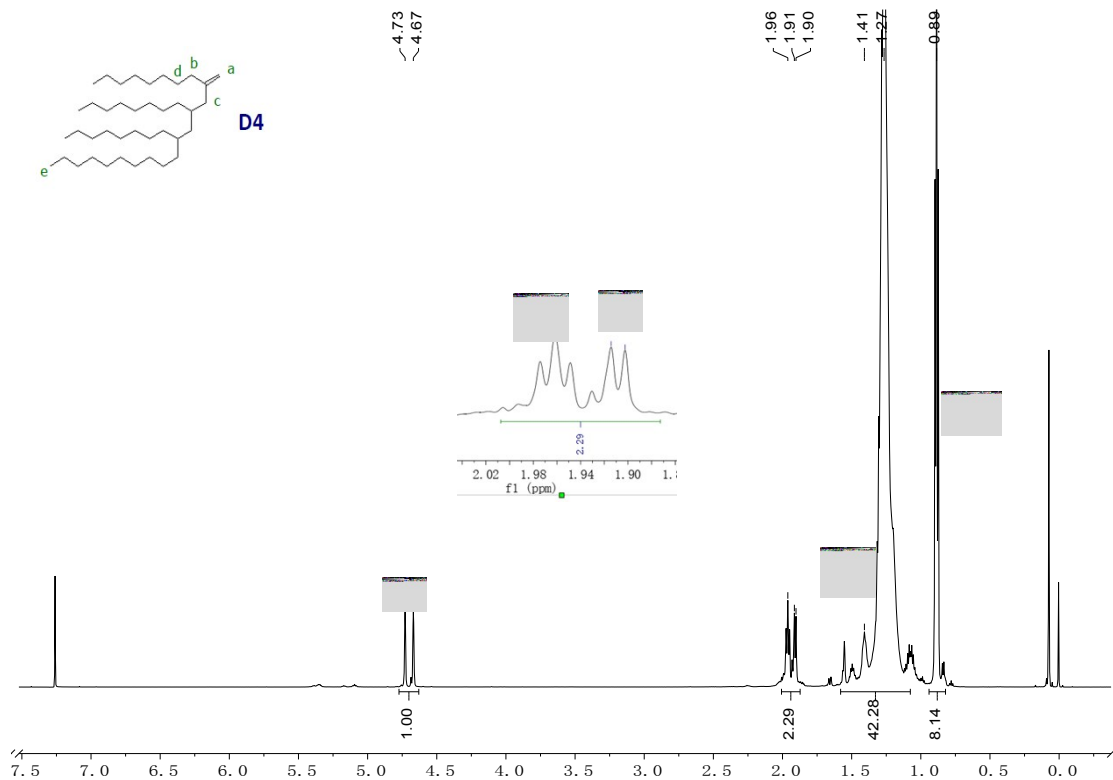

<sup>1</sup>H NMR spectrum of the Tetramer of 1-C<sub>10</sub>

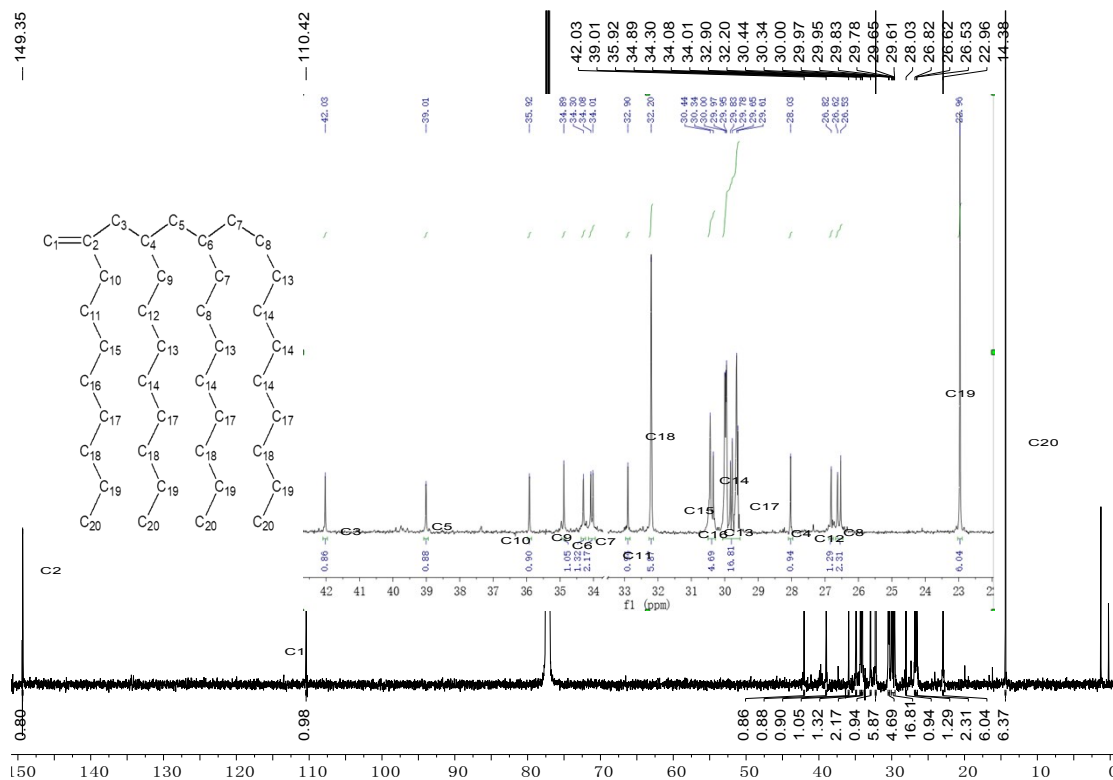

<sup>13</sup>C NMR spectrum of the Tetramer of 1-C<sub>10</sub>

## 4. spectrum of 1-dodecene oligomer

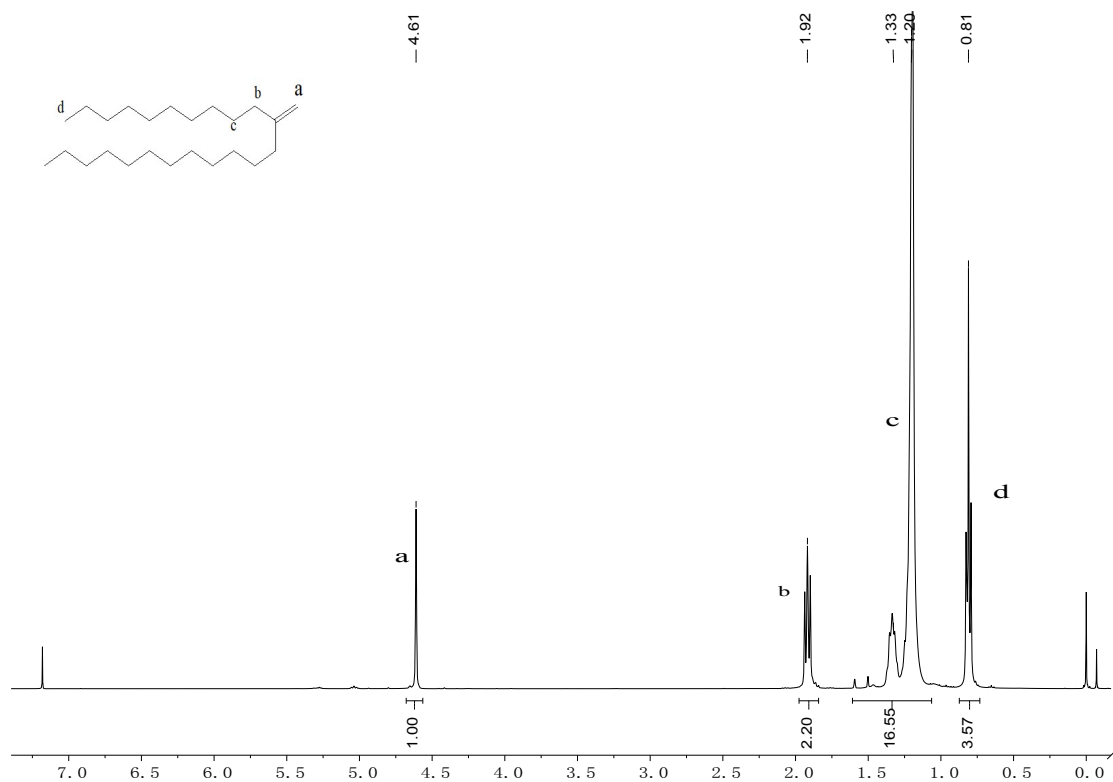

$^1\text{H}$  NMR spectrum of the dimer of 1-C<sub>12</sub>

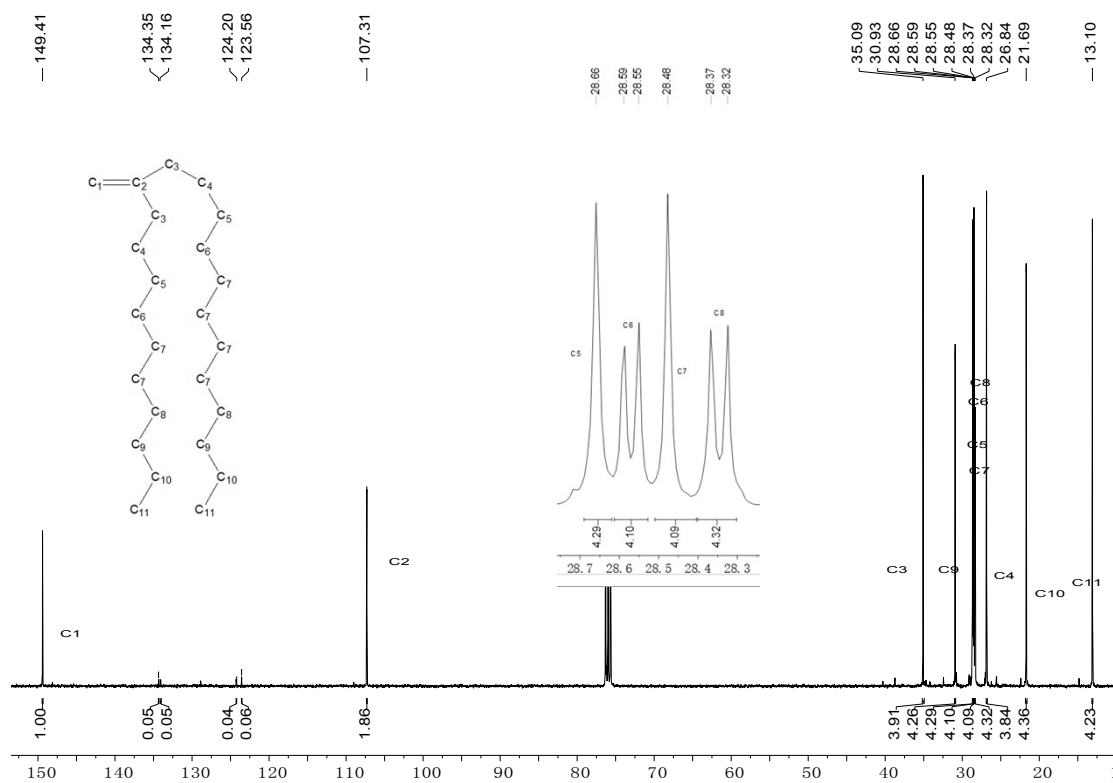

$^{13}\text{C}$  NMR spectrum of the dimer of 1-C<sub>12</sub>

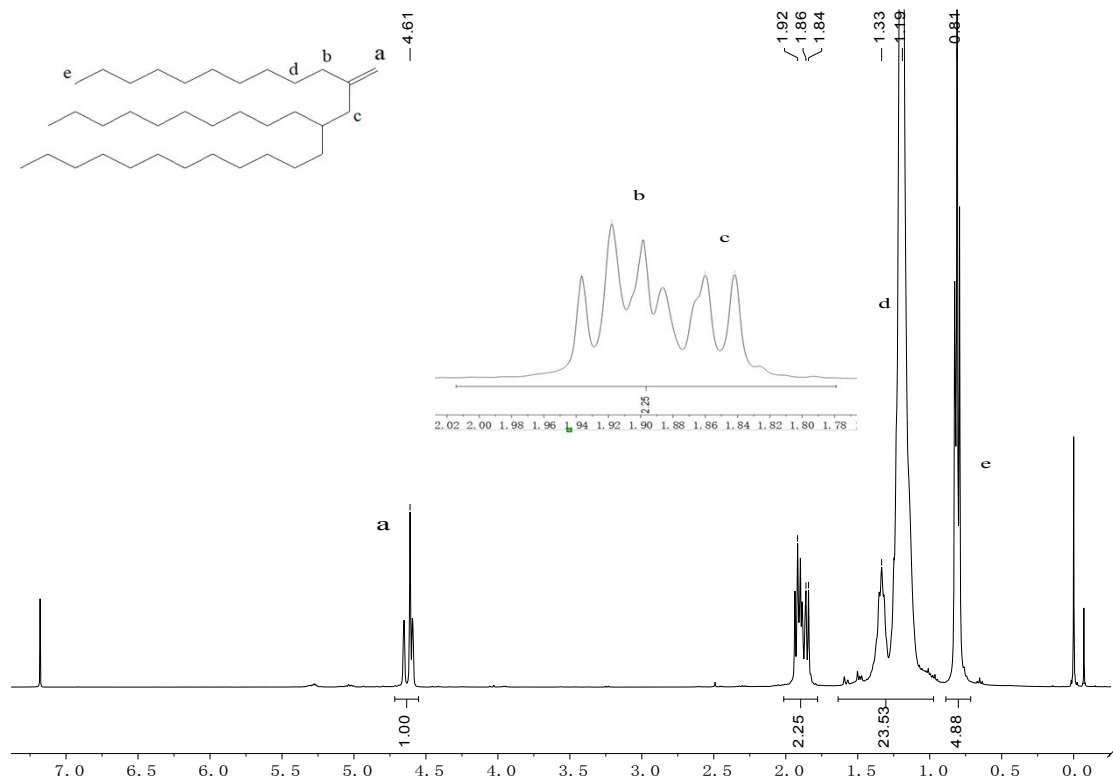

$^1\text{H}$  NMR spectrum of the Timer of 1- $\text{C}_{12}$

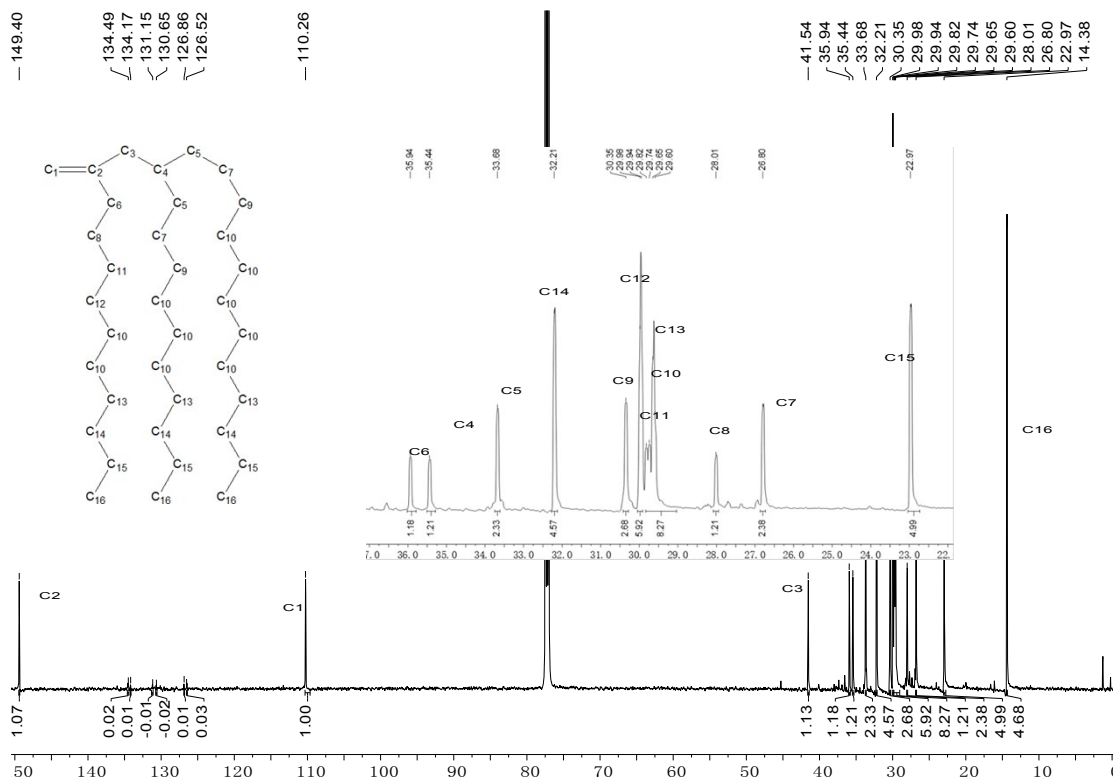

$^{13}\text{C}$  NMR spectrum of the Timer of 1- $\text{C}_{12}$
